# Supplementary material for: The potential of zero charge and solvation effects on single-atom M–N–C catalysts for oxygen electrocatalysis
Source: Royal Society of Chemistry journal article supplement (doi:10.1039/d4ta02285h), 2024-01-01
Supplement: d4ta02285h1.pdf [file d4ta02285h1.pdf]

## Supplementary Information

### **The Potential of Zero Charge and Solvation Effects on Single-Atom M–N–C Catalysts for Oxygen Electrocatalysis**

Di Zhang\* and Hao Li\*

Advanced Institute for Materials Research (WPI-AIMR), Tohoku University, Sendai 980-8577, Japan

**\* Corresponding Authors:**

[di.zhang.a8@tohoku.ac.jp](mailto:di.zhang.a8@tohoku.ac.jp) (D. Z.)

[li.hao.b8@tohoku.ac.jp](mailto:li.hao.b8@tohoku.ac.jp) (H. L.)

**Table S1** Comparison between the potential of zero charges (PZCs) acquired from explicit and implicit solvation models (unit: V/SHE)

| <b>M-N-C catalysts</b>     | <b>Explicit solvation PZCs</b> | <b>Implicit solvation PZCs</b> |
|----------------------------|--------------------------------|--------------------------------|
| Cr-pyrrole-N <sub>4</sub>  | 0.054 ± 0.03                   | -0.150                         |
| Mn-pyrrole-N <sub>4</sub>  | 0.254 ± 0.05                   | -0.056                         |
| Fe-pyrrole-N <sub>4</sub>  | 0.338 ± 0.04                   | 0.055                          |
| Co-pyrrole-N <sub>4</sub>  | 0.384 ± 0.07                   | 0.119                          |
| Ni-pyrrole-N <sub>4</sub>  | 0.354 ± 0.07                   | 0.205                          |
| Cu-pyrrole-N <sub>4</sub>  | 0.428 ± 0.08                   | 0.174                          |
| Cr-pyridine-N <sub>4</sub> | -0.864 ± 0.05                  | -0.897                         |
| Mn-pyridine-N <sub>4</sub> | -0.787 ± 0.02                  | -0.679                         |
| Fe-pyridine-N <sub>4</sub> | -0.618 ± 0.05                  | -0.665                         |
| Co-pyridine-N <sub>4</sub> | -0.526 ± 0.06                  | -0.611                         |
| Ni-pyridine-N <sub>4</sub> | -0.335 ± 0.03                  | -0.575                         |
| Cu-pyridine-N <sub>4</sub> | -0.506 ± 0.05                  | -0.644                         |

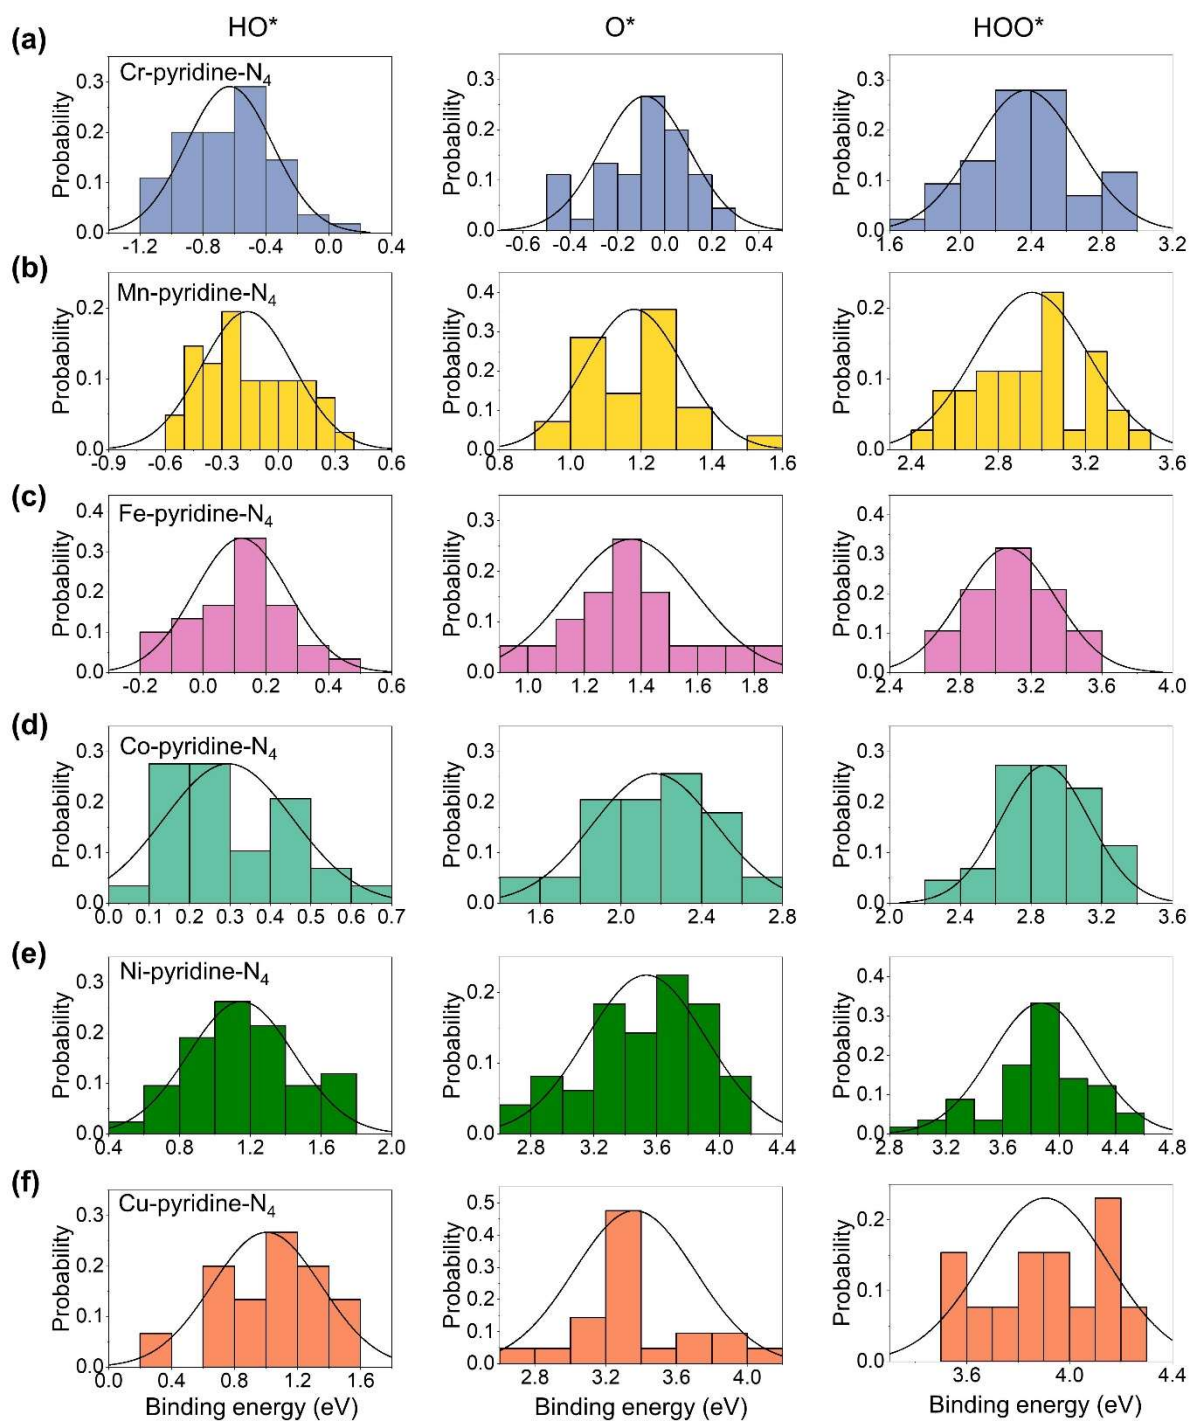

**Figure S1.** Solvation effects on the adsorption energies of  $\text{HO}^*$ ,  $\text{O}^*$ , and  $\text{HOO}^*$  on M-N-C Catalysts.

Panels (a-f) detail the adsorption energies of  $\text{HO}^*$ ,  $\text{O}^*$ , and  $\text{HOO}^*$  in a solvation environment on (a)

Cr-, (b) Mn-, (c) Fe-, (d) Co-, (e) Ni-, and (f) Cu-pyridine-N, respectively.

**Table S2** Summary of the implicit solvation effects ( $E_{ads}^{change}$ ) on M-N-C catalysts calculated based on the VASPsol package. (Unit: eV)

| Metal site | M <sub>1</sub> -pyrrole-N <sub>4</sub> |        |        | M <sub>1</sub> -pyridine-N <sub>4</sub> |        |        |
|------------|----------------------------------------|--------|--------|-----------------------------------------|--------|--------|
|            | HO*                                    | O*     | HOO*   | HO*                                     | O*     | HOO*   |
| <b>Cr</b>  | -0.188                                 | -0.018 | -0.225 | -0.157                                  | -0.059 | -0.325 |
| <b>Mn</b>  | -0.034                                 | -0.226 | -0.080 | -0.172                                  | 0.031  | -0.671 |
| <b>Fe</b>  | 0.033                                  | -0.055 | -0.138 | -0.153                                  | -0.208 | -0.234 |
| <b>Co</b>  | -0.371                                 | -0.067 | -0.427 | -0.169                                  | -0.090 | -0.548 |
| <b>Ni</b>  | -0.250                                 | -0.073 | -0.072 | -0.289                                  | -0.258 | -0.235 |
| <b>Cu</b>  | -0.337                                 | -0.667 | -0.203 | -0.150                                  | -0.500 | -0.713 |

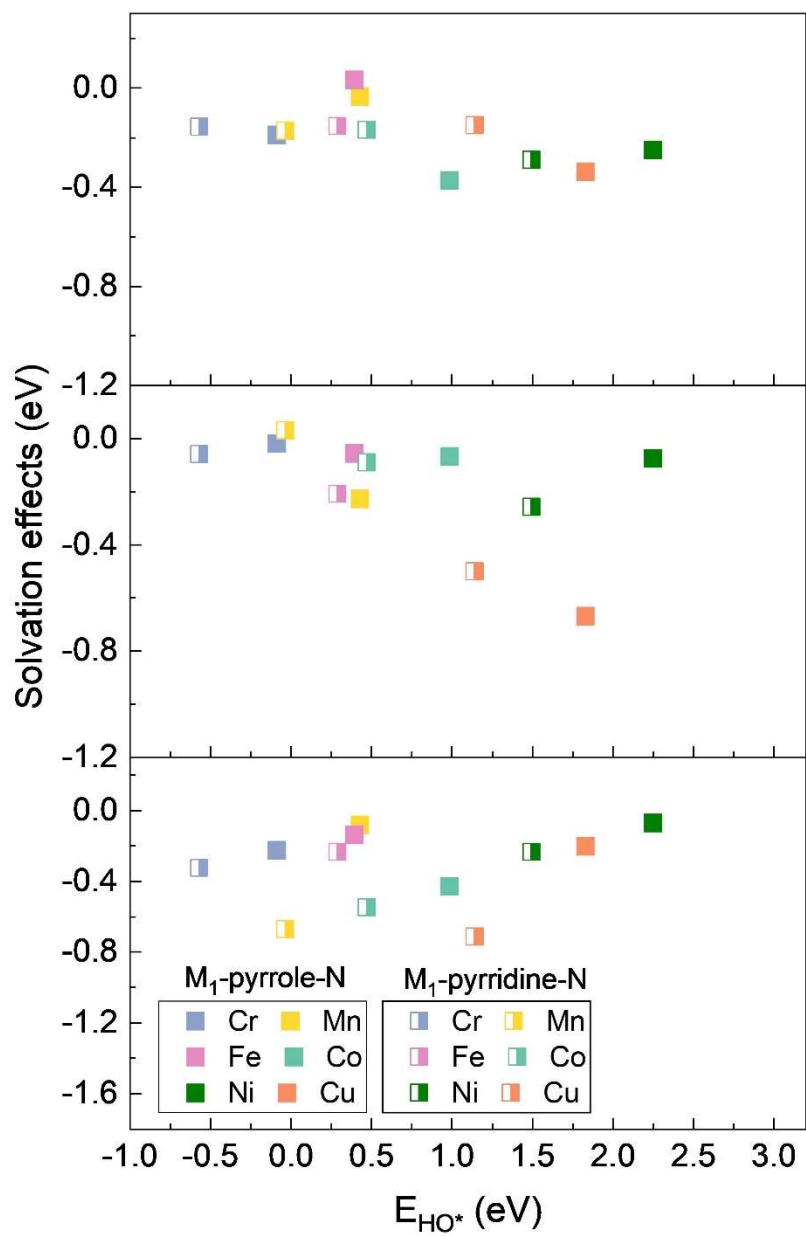

**Figure S2.** Analyses of implicit solvation effects on the adsorption energies of  $\text{HO}^*$ ,  $\text{O}^*$ , and  $\text{HOO}^*$ .
